# Supplementary material
Source: Royal Society of Chemistry journal article supplement (doi:10.1039/d5fo04970a)
Supplement: d5fo04970a1.pdf [file d5fo04970a1.pdf]

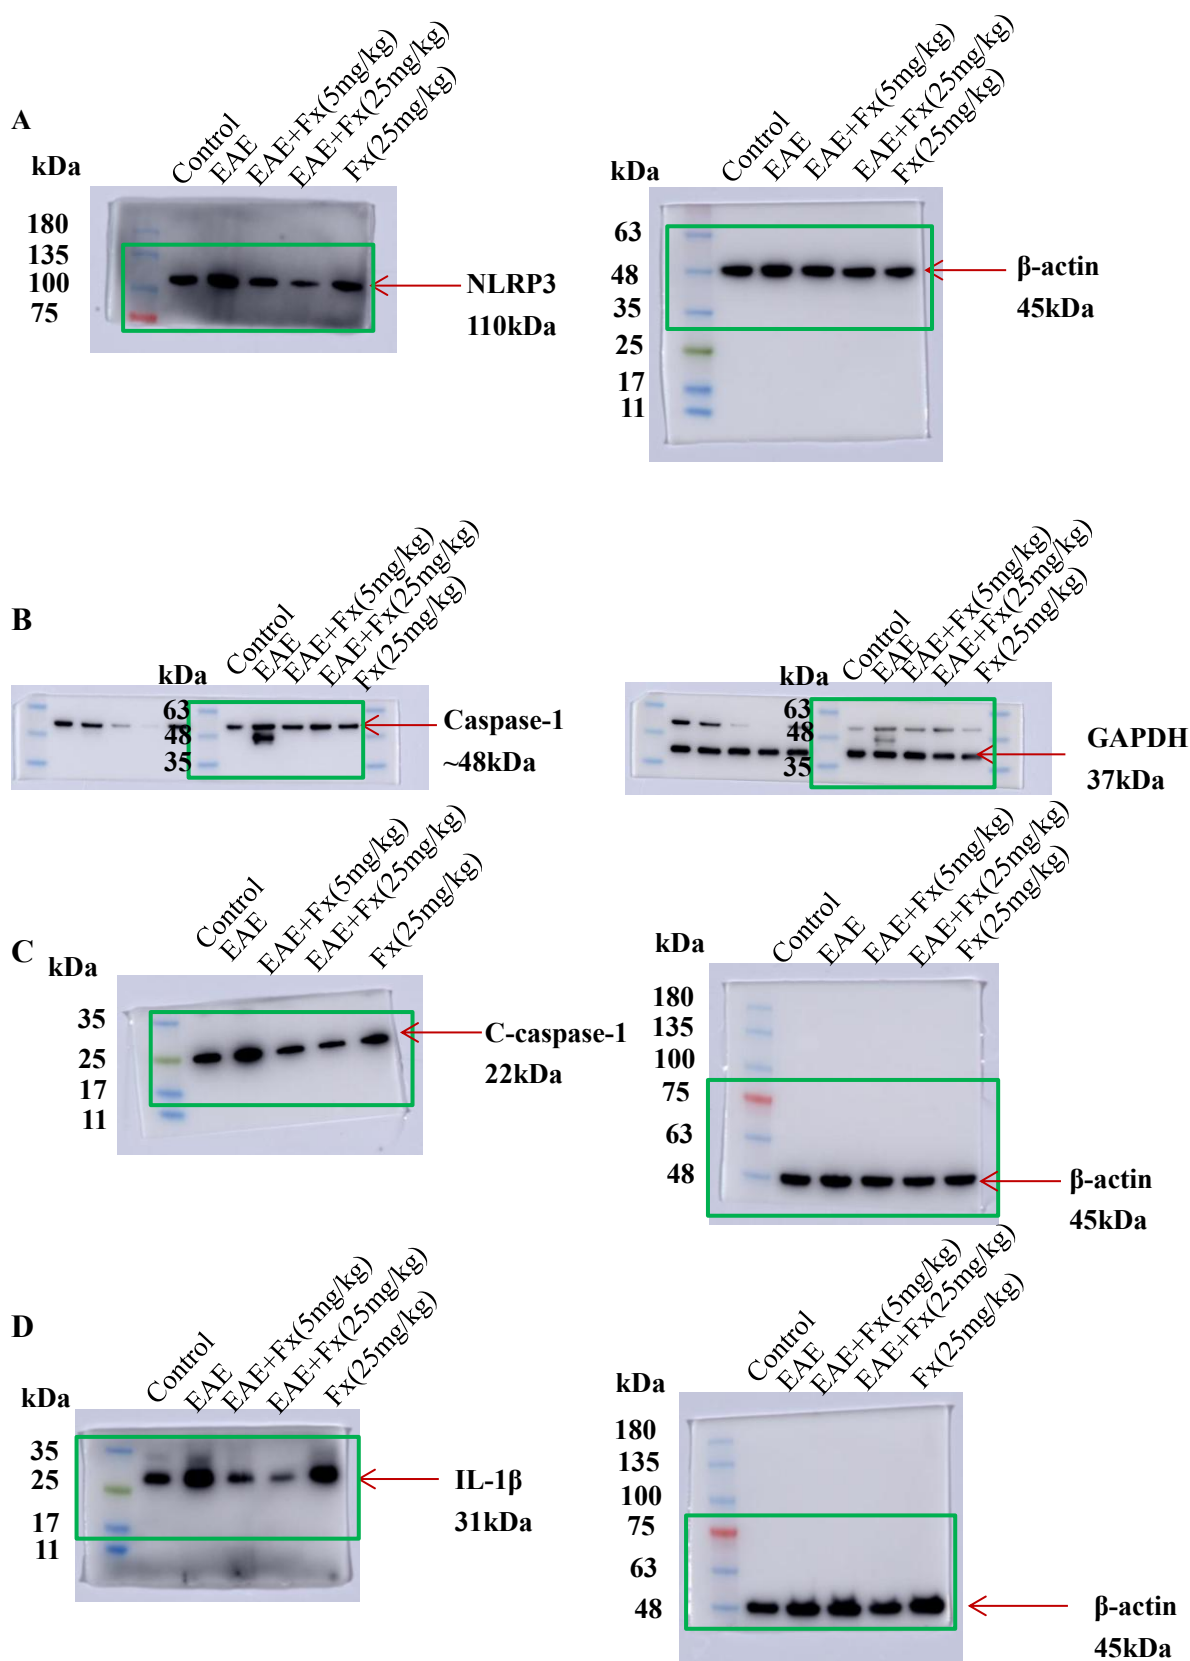

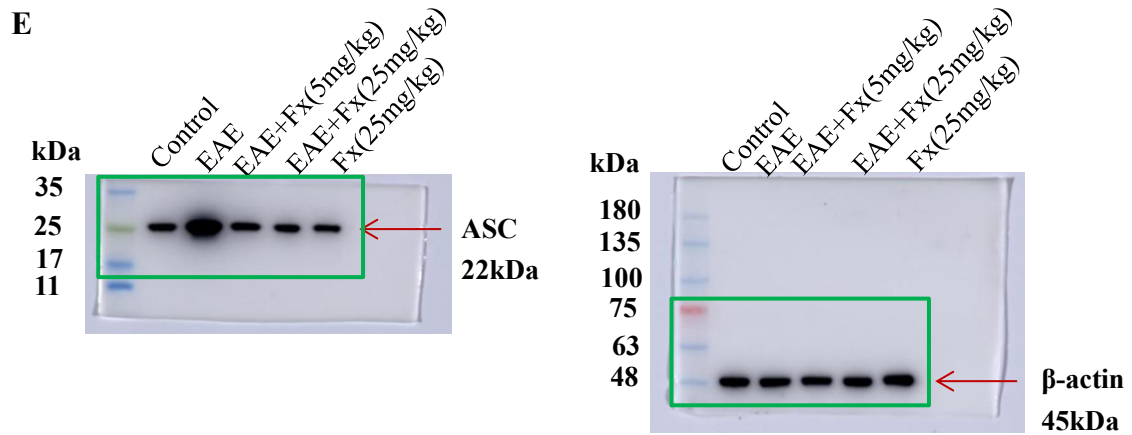

**Figure S1** Original western blot results of (A) NLRP3 and  $\beta$ -actin (B) Caspase-1 and GAPDH (C) C-caspase-1 and  $\beta$ -actin, (D) IL-1 $\beta$  and  $\beta$ -actin, (E) ASC and  $\beta$ -actin in mice spinal cords for Figure 3C-G, respectively

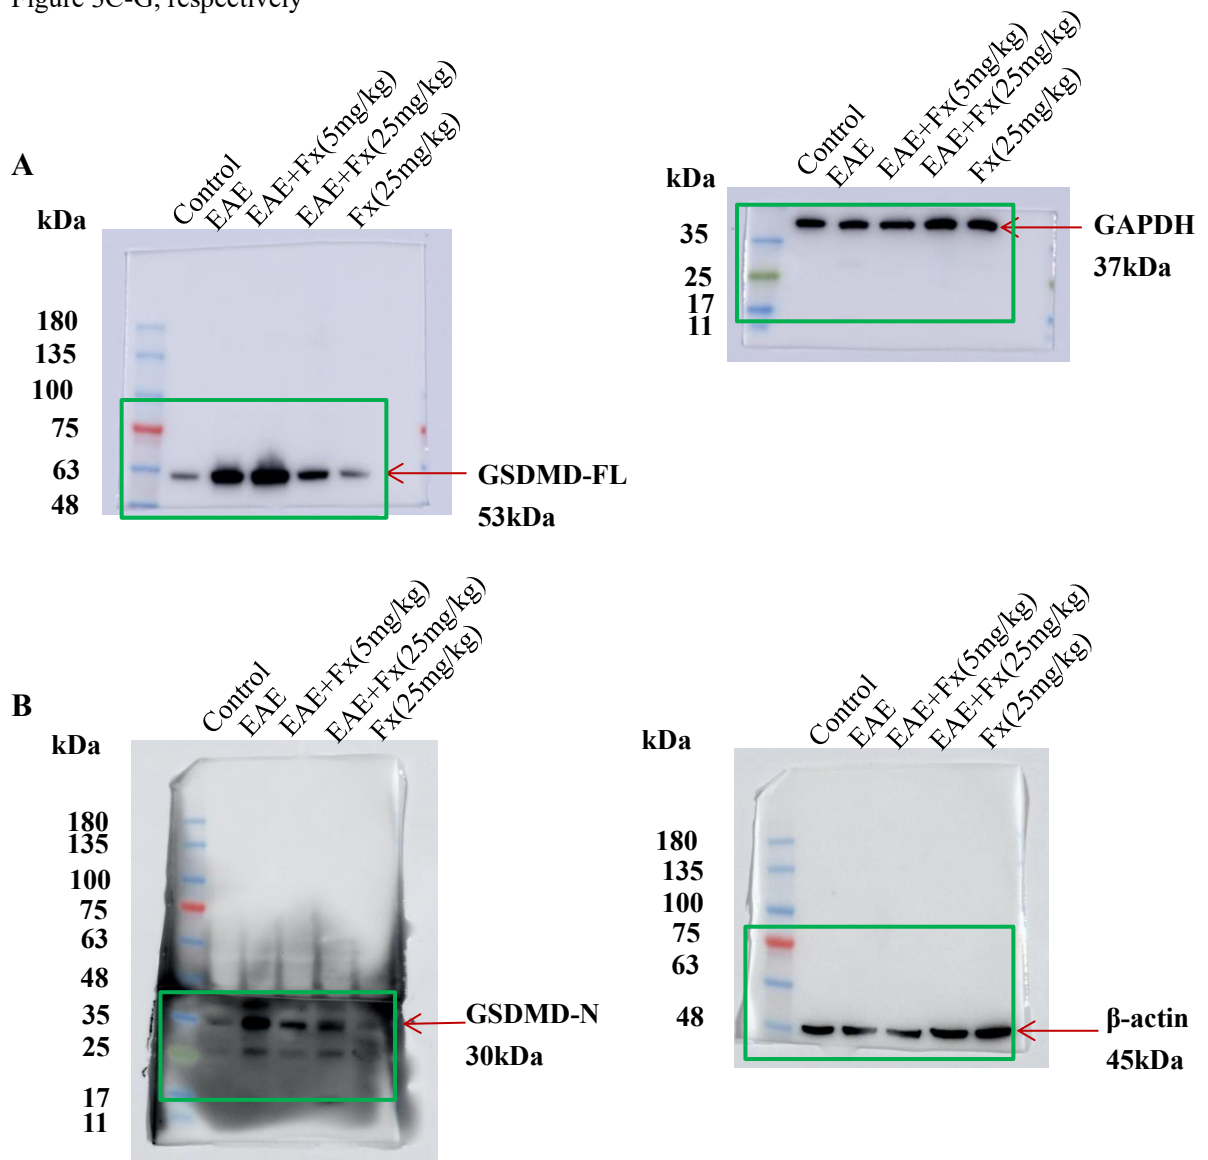

**Figure. S2** Original western blot results of (A) GSDMD-FL and GAPDH (B) GSDMD-N and

$\beta$ -actin in mice spinal cords for Figure 4C and D, respectively

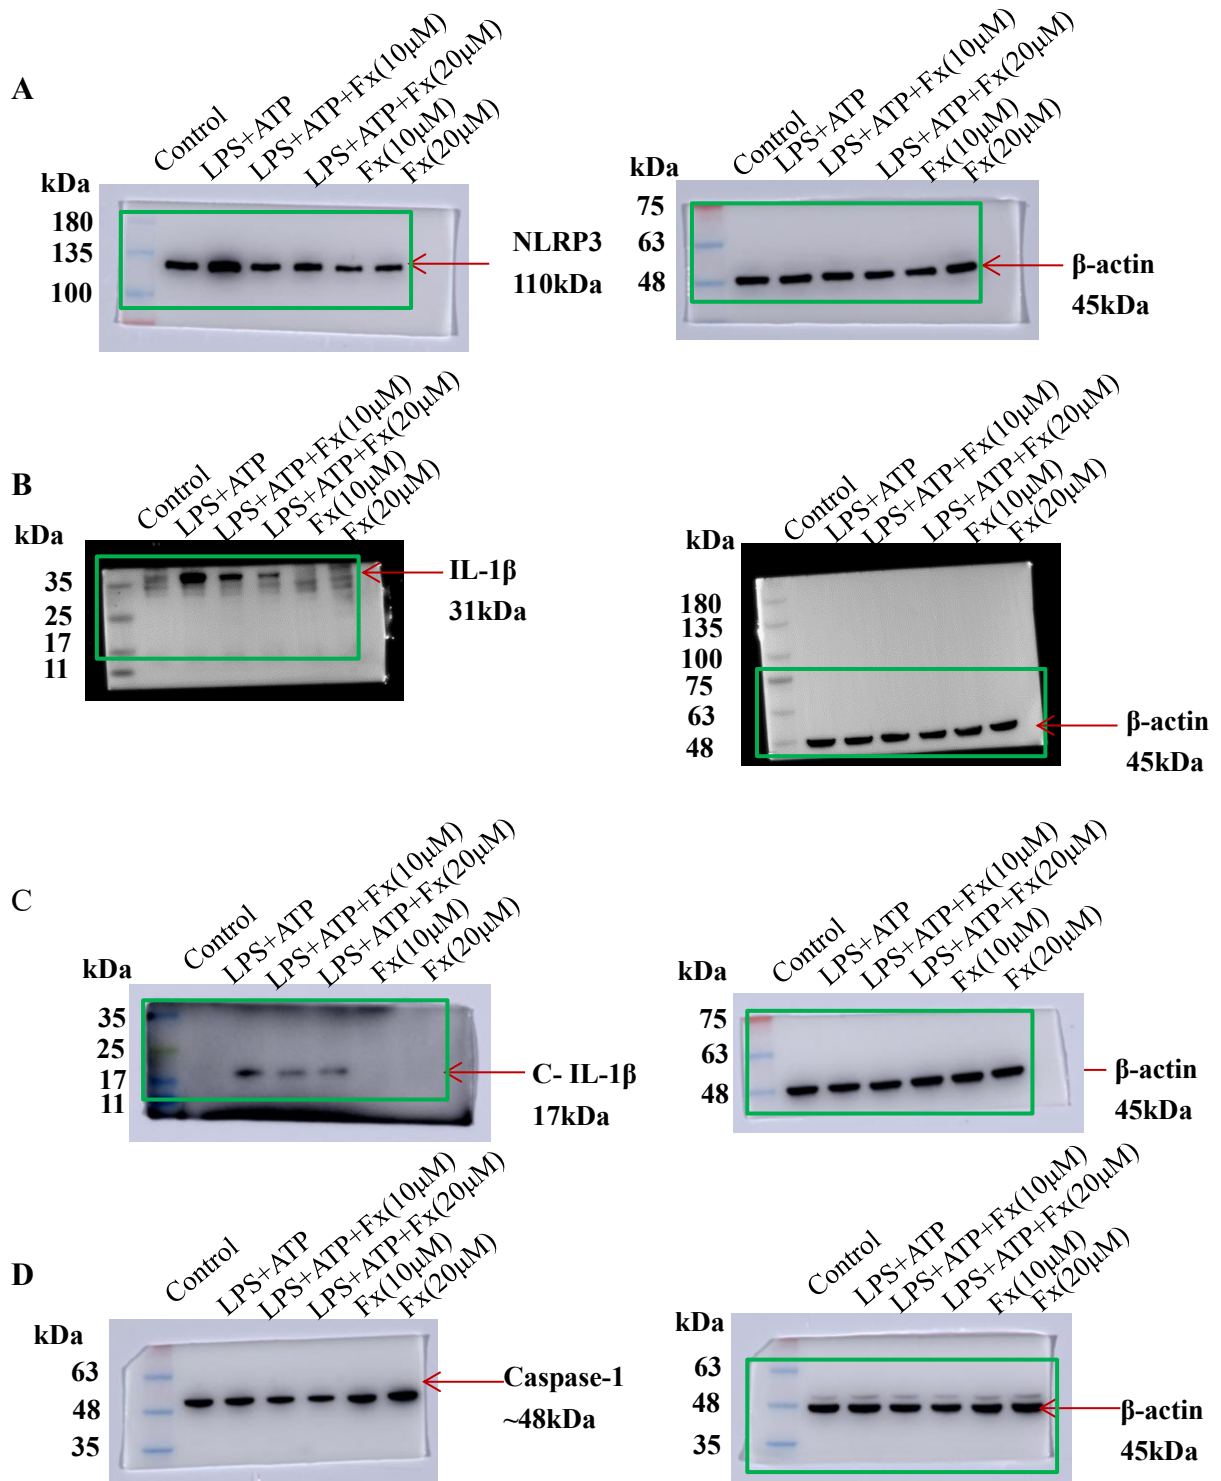

**Figure S3** Original western blot results of (A) NLRP3 and  $\beta$ -actin, (B) IL-1 $\beta$  and  $\beta$ -actin (C) C- IL-1 $\beta$  and  $\beta$ -actin, (D) Caspase-1 and  $\beta$ -actin in BV2 for Figure 6A-D, respectively

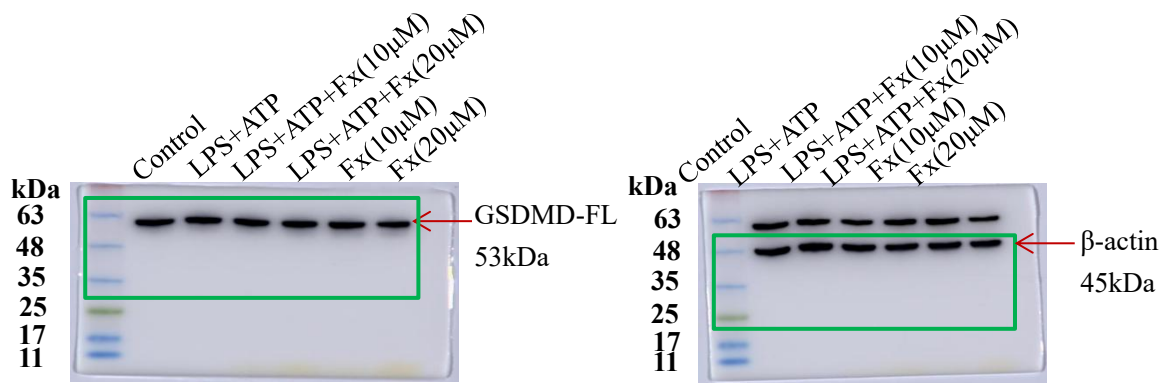

**Figure S4** Original western blot results of GSDMD-FL and  $\beta$ -actin in BV2 for Figure 7A

Table S1. Primary and secondary antibodies used in this study.

| Antibody                            | Supplier                  | Catalog No.   | Application                        |
|-------------------------------------|---------------------------|---------------|------------------------------------|
| NLRP3                               | Cell Signaling Technology | 15101         | WB                                 |
| Caspase-1                           | Cell Signaling Technology | 24232         | WB                                 |
| Cleaved caspase-1                   | Cell Signaling Technology | 89332         | WB                                 |
| ASC                                 | Cell Signaling Technology | 67824         | WB                                 |
| IL-1 $\beta$                        | Cell Signaling Technology | 31202         | WB                                 |
| Cleaved IL-1 $\beta$                | Cell Signaling Technology | 63124         | WB                                 |
| GSDMD-FL                            | Cell Signaling Technology | 39754         | WB                                 |
| GSDMD-N                             | Cell Signaling Technology | 10137         | WB                                 |
| Iba-1                               | Servicebio                | GB15105       | IF                                 |
| GFAP                                | Servicebio                | GB15096       | IF                                 |
| NLRP3                               | Servicebio                | GB114320      | IF                                 |
| GSDMD                               | Proteintech               | 66387-1-Ig    | IF                                 |
| GSDMD                               | SabbioTech                | 53120-1       | IF (BV2 cells)                     |
| Cleaved caspase-1                   | MedChemExpress            | HY-P8062<br>2 | IF (BV2 cells)                     |
| CD45 (PE-conjugated)                | BioLegend                 | 147712        | Flow cytometry (spinal cord)       |
| CD86 (APC-conjugated)               | BioLegend                 | 105012        | Flow cytometry (spinal cord & BV2) |
| CD11b (FITC-conjugated)             | BioLegend                 | 101205        | Flow cytometry (spinal cord)       |
| CD206 (PerCP/Cyanine5.5-conjugated) | BioLegend                 | 141716        | Flow cytometry (spinal cord)       |
| CD206 (FITC-conjugated)             | BioLegend                 | 141704        | Flow cytometry (BV2 cells)         |
| HRP-conjugated secondary antibody   | Cell Signaling Technology | 7074          | WB                                 |

**Table S2. Other biological reagents and kits used in this study**

| <b>Reagent</b>                   | <b>Supplier</b>              | <b>Catalog No.</b> |
|----------------------------------|------------------------------|--------------------|
| Complete Freund's adjuvant (CFA) | Sigma-Aldrich                | F5881              |
| Pertussis toxin                  | List Biological Laboratories | 181                |
| Fucoxanthin                      | Abmole                       | M10301             |
| LPS                              | Solarbio                     | L8880              |
| IFN- $\gamma$                    | PeptoTech                    | AF-315-05          |
| IL-4                             | PeptoTech                    | AF-214-14          |
| ATP                              | Abmole                       | M5432              |
| Collagenase type IV              | Solarbio                     | C8160              |
| Percoll                          | GE Healthcare                | 17-0891-09         |
| Tissue Storage Solution          | Miltenyi Biotec              | 130-100-008        |
| RIPA lysis buffer                | Solarbio                     | P0013              |
| PMSF                             | Solarbio                     | P0100              |
